# Supplementary material for: Discovery of a ferroelastic topological insulator in a two-dimensional tetragonal lattice
Source: Royal Society of Chemistry journal article supplement (doi:10.1039/c9cp00272c), 2019-01-01
Supplement: c9cp00272c1.pdf [file c9cp00272c1.pdf]

## Supporting information

### Discovery of ferroelastic topological insulator in two-dimensional tetragonal lattice

An-ning Ma, Sheng-shi Li, Shu-feng Zhang, Chang-wen Zhang,\* Wei-xiao Ji,

Ping Li, Pei-ji Wang

School of Physics and Technology, University of Jinan, Jinan, Shandong, 250022, People's Republic of China

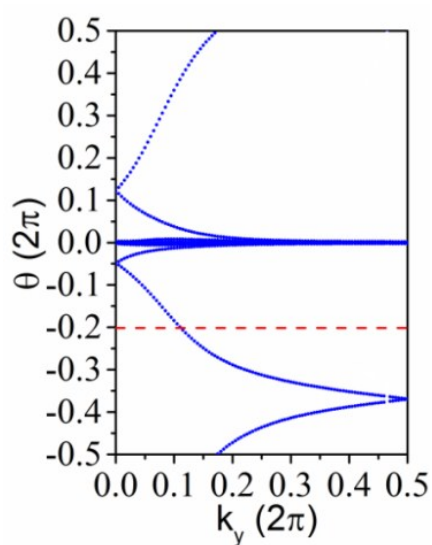

Fig. S1 The evolution of wannier function center of the  $t$ -HfC monolayer.
